# Supplementary material for: Effect of the direct renin inhibitor aliskiren on left ventricular remodelling following myocardial infarction with systolic dysfunction
Source: Oxford University Press journal article supplement (doi:10.1093/eurheartj/ehq522), 2011-02-10
Supplement: ehq522_Supplementary_Data.zip [file ehq522_Supplementary_Data.zip]

Archive with 1 entries (1 files):
- ehq522supp.pdf
